# Supplementary material
Source: PubMed Central journal article supplement (PMC8959474)
Supplement: mmc1.pdf [file mmc1.pdf]

# THE LANCET

## Supplementary appendix

This appendix formed part of the original submission. We post it as supplied by the authors.

Supplement to: Ehsan AN, Park KB, Pigeolet M. An open letter to the Executive Board of WHO from the surgical and anaesthesia community. *Lancet* 2022; published online Mar,25. [https://doi.org/10.1016/S0140-6736\(22\)00521-9](https://doi.org/10.1016/S0140-6736(22)00521-9).

## Supplementary Material

| <b>Table of Contents</b>                                 | <b>Page Number(s)</b> |
|----------------------------------------------------------|-----------------------|
| Supplementary Material 1 -<br>Acknowledgements           | 2                     |
| Supplementary Material 2 -<br>Individual Signatories     | 3-13                  |
| Supplementary Material 3 -<br>Organizational Signatories | 14                    |

## **Supplementary Material 1**

### **Acknowledgments**

ANE and MP contributed to the writing of the original draft and review and editing. KBP contributed to the review and editing process.

MP is supported by a GRANT of the Belgian Kids' Fund (BKF) for Pediatric Research. All other authors declare no competing interests.

## Supplementary Material 2

### An open letter to the Executive Board of WHO from the surgical and anaesthesia community Individual Signatories

1. **Abbie Naus, MD (United States of America)**  
Research Fellow; Program in Global Surgery and Social Change, Harvard Medical School
2. **Abhinav Reddy, Sc.M. (United States of America)**  
University of Illinois College of Medicine
3. **Abhishek Sengupta, MBA (India)**  
Operation Smile, Inc.
4. **Adelina Mazhiqi, MD (Sweden)**  
Department of Urology, Region Skåne
5. **Aderonke Adesiyun, MBBS, DA(WACS), FWACS (Nigeria)**  
Immediate past secretary; Nigerian Society of Anaesthetists
6. **Adrian W Gelb, MBChB, FRCPC (United Kingdom)**  
President; World Federation of Societies of Anaesthesiologists
7. **Agneta Odera, MBChB, FCS (ECSA) General, Pediatric & Cardiothoracic surgery (Kenya)**  
Consultant Surgeon; Tenwek Hospital
8. **Agya Boakye Atonsah Prempeh, BSc (Med), MBChB, DA (SA), FCA (SA), MMed (Anes) (Canada)**  
London Health Sciences Centre, Ontario,
9. **Ahmed Abdulsalam Hadi, MD (Yemen)**  
Junior Doctors Network
10. **Ahmed Aboushady, MD, MPH (United States of America)**  
Harvard T.H Chan School of Public Health
11. **Ahmed Khaled Awad, MD (Egypt)**  
Resident; Faculty of Medicine, Ain-Shams University
12. **Ahmed Negida, MD, PhD (United States of America)**  
Research Fellow; Program in Global Surgery and Social Change, Harvard Medical School
13. **Asitha Jayawardena, MD, MPH (United States of America)**  
Associate Professor of Pediatric Otolaryngology, Children's Minnesota
14. **Barnabas Tobi Alayande, MBBS, PgDTh, MBA, FMCS (Rwanda)**  
Global Surgery Fellow; University of Global Health Equity
15. **Alexander Peters, MD, MPH (United States of America)**  
Weill Cornell Surgery
16. **Alexandre Edgard Murinzi, MD (Rwanda)**  
Medical Officer; Kibogora District Hospital
17. **Alia Lutfi, Medical Student (Malaysia)**  
General Member; InciSioN Malaysia
18. **Aliya Moreira, MPH (United States of America)**  
Medical Student; University of Michigan Medical School
19. **Amanda Dawson, MBBS MS MM FRACS (Australia)**  
Clinical Dean; Gosford Hospital
20. **Amar Sheth, BS (United States of America)**  
Medical Student; Yale School of Medicine
21. **Ambereen Sleemi, MD, MPH (United States of America)**  
Executive Director; International Medical Response
22. **Amina Seguya, MD (Uganda)**  
Consultant; Mulago National Referral Hospital
23. **Anant Naik, BS (United States of America)**  
Carle Illinois College of Medicine
24. **Andre Yvan Zolo Ossou, MD (South Africa)**  
Board Member; Association of Future African Neurosurgeons (AFAN)
25. **Ankana Daga, MD (United States of America)**  
Boston Children's Hospital
26. **Ankit Raj, MBBS (India)**  
Orthopedic Centre
27. **Ann Renee Lewis, MPH (Haiti)**  
Executive Director; Project Medishare

28. **Ann Rhomberg, MSW (United States of America)**  
Executive Director; Solidarity Bridge
29. **Anne Hansen, MD MPH (United States of America)**  
Medical Director of NICU; Boston Children's Hospital
30. **Annekathryn Goodman, MD, MPH, MS, MA (United States of America)**  
Massachusetts General Hospital
31. **Antonio Reyes, MD (Venezuela)**  
Instructor professor; UNEFM
32. **Anusha Jayaram, BA (United States of America)**  
Medical Student; Tufts University School of Medicine
33. **Arsen Muhumuza, MD (Rwanda)**  
Global Surgery Fellow, Operation Smile, Inc.
34. **Arsene Daniel Nyalundja, MD (Democratic Republic of the Congo)**  
Association of Future African Neurosurgeons (AFAN)
35. **Ashfaq Abdulshakoor, MD, MMed (ENT) (Tanzania)**  
ENT Specialist; Regency Medical Centre
36. **Ashok Johari, M.S.Orth., M.Ch.Orth., F.R.C.S., F.A.M.S. (Belgium)**  
President; International Society of Orthopaedic Surgery and Traumatology (SICOT)
37. **Atenas Bustamate, MD (Peru)**  
Operation Smile, Inc.
38. **Augustino Hellar, MD, MMed, MBA**  
Program Director; Operation Smile, Inc.
39. **Ayo Douglas, B.S. (United States of America)**  
Harvard T.H Chan School of Public Health
40. **Azam Ahmed, MD, FAANS, FACS (United States of America)**  
University of Wisconsin
41. **Babatunde Akinwunmi, MD, MPH, MMSc (United States of America)**  
Brigham and Women's Hospital
42. **Professor Badr Eldin Mostafa (Egypt)**  
Professor Emeritus; Ain-Shams University
43. **Barth A. Green, MD (United States of America)**  
Executive Dean; University of Miami Global Institute
44. **Dr Bashir Yunusa (Liberia)**  
Secretary General; West African College of Surgeons Liberia
45. **Belain Eyob, MD (United States of America)**  
Research Fellow; Program in Global Surgery and Social Change, Harvard Medical School
46. **Bert Dhondt, MD (Belgium)**  
Ghent University
47. **Bhaskar Raj Pant, MD (Nepal)**  
Executive Member, Orthopaedic Surgeon, Rural Trauma Care Lead; Nyaya Health Nepal
48. **Bisola Onajin-Obembe, MBBS, FWACS, PhD (Nigeria)**  
Professor of Anaesthesiology; University of Port Harcourt
49. **Brandon G. Rocque, MD, MS (United States of America)**  
Associate Professor of Neurosurgery; University of Alabama at Birmingham
50. **Brenda Sequeira Dmello, MD, MMed OBGYN (Tanzania)**  
Technical advisor MNHC program, Head of OBGYN Department; CCBRT
51. **Bruce Biccard, MBChB, PhD (South Africa)**  
Professor & Second Chair, Department of Anaesthesia & Perioperative Medicine; University of Cape Town
52. **Dr C. Odula, M.Med (Ob Gyn) (Kenya)**  
Chair Nairobi Division, Kenay Medical Association
53. **C. Yoonhee Ryder, BS (United States of America)**  
University of Michigan Medical School
54. **Callum Forbes, MBChB (Rwanda)**  
Global Surgery Fellow, University of Global Health Equity
55. **Camilla G. Aukrust, M.phil (Norway)**  
PhD Research Fellow and RN; Oslo University Hospital
56. **Cappeliez Serge, MD (Belgium)**  
Head of Clinic Thoracic Surgery; C.H.U. Charleroi
57. **Caroline Wight, MS (United States of America)**  
Medical Student; Tufts University School of Medicine

58. **Ché L Reddy, MBChB, MPH (United States of America)**  
Associate Director; Harvard University
59. **Chifundo Msokera, MD (Malawi)**  
Global Surgery Fellow, Operation Smile, Inc.
60. **Christian El Amm, MD (United States of America)**  
Professor of Surgery; University of Oklahoma
61. **Christina Briscoe Abath, MD (United States of America)**  
Resident; Boston Children's Hospital
62. **Clara Marie Kerwin, BA (United States of America)**  
Medical Student; University of Colorado School of Medicine
63. **Claudia Elena Arenas Ponce, MD (Canada)**  
University of British Columbia
64. **Craig D. McClain, MD, MPH (United States of America)**  
Faculty & Director of Education; Program in Global Surgery and Social Change, Harvard Medical School
65. **Craig Steven McLachlan, PhD, MPH&TM (Australia)**  
Vice President Advisory Board; Kibos International Health Foundation
66. **Crecencia Mashauri, MD (Russia)**  
Tambov State University
67. **Dabota Yvonne Buowari, MD (Nigeria)**  
Medical Women's Association of Nigeria
68. **Dalle David Ulrich, MBBS (Russia)**  
North Ossetia State Medical Academy
69. **Daniel B. Peterson, MBA, CPA (United States of America)**  
Executive Director (Interim); Global Alliance for Surgical, Obstetric, Trauma, & Anaesthesia Care (G4 Alliance)
70. **Daniel Jaffurs, MD, PhD (United States of America)**  
Professor of Plastic Surgery; University of California Irvine
71. **Daniel K Ojuka, PhD (Kenya)**  
Senior Lecturer; University of Nairobi
72. **Daniel Safari Nteranya, MD (Cameroon)**  
Research Fellow; Association of Future Africans Neurosurgeons
73. **Daniel Scott Corlew, MD, MPH (United States of America)**  
Lecturer; Harvard Medical school
74. **David Allen Shaye, MD, MPH (United States of America)**  
Assistant Professor; Harvard Medical school
75. **David Rapp, MD (United States of America)**  
President; Global Surgical Expedition
76. **Dr Dawin Sichimba (Cameroon)**  
President; Association of Future African Neurosurgeons
77. **Delafontaine, PhD (Belgium)**  
Université Libre de Bruxelles
78. **Desmond Tanko Jumbam, MSGH (United States of America)**  
Director of Policy and Advocacy; Operation Smile, Inc.
79. **Diana D. del Valle, MD (United States of America)**  
Research Fellow; Program in Global Surgery and Social Change, Harvard Medical School
80. **Dieter Morales-García, MD, PhD (Spain)**  
Staff Surgeon; University Hospital Virgen de la Victoria, Malaga
81. **Dina Tadros, MD (United States of America)**  
Harvard University
82. **Disty Pearson, PA-C (United States of America)**  
Vice President; Global Alliance of Rheumatic and Congenital disease
83. **Dominique Vervoort, MD, MPH, MBA (Canada)**  
PhD student; University of Toronto
84. **Dr Doreen Nakku (Uganda)**  
ENT Surgeon; Mbarara University of Science and Technology
85. **Edmond Sakai, MA (Brazil)**  
Operation Smile, Inc.
86. **Eglė Janušonytė, MD (Lithuania)**  
Vilnius University Centre of Dermatovenereology
87. **Elaine Tan Su Yin, MBBS (Malaysia)**

88. **Elise Lupon, MD, MSc (United States of America)**  
Research Fellow; Harvard Medical School
89. **Elliot Chaikof, MD, PhD (United States of America)**  
Harvard Medical School
90. **Elliott H Taylor, MBBS (United Kingdom)**  
University of Oxford
91. **Elyse LeeVan, MD (United States of America)**  
Physician; Henry M. Jackson Foundation for the Advancement of Military Medicine
92. **Emma Svensson, MD, MSc (Sweden)**  
Doctoral Student; Department of Clinical Sciences, Lund University
93. **Dr Enrique Colás-Ruiz (Spain)**  
Hospital Son Llätzer
94. **Eric K. Kim, BA (United States of America)**  
Research Associate; Program in Global Surgery and Social Change, Harvard Medical School
95. **Ernest Kromah Gaie, MEd, MSc (United States of America)**  
Vice President; Operation Smile, Inc.
96. **Eva Njenga, MD (Kenya)**  
Chair, Kenya Medical Practitioners and Dentists Council
97. **Dr Faith Mugoha Odwaro (United States of America)**  
Research Fellow; Program in Global Surgery and Social Change, Harvard Medical School
98. **Faraz Alizadeh, MD (United States of America)**  
Pediatric Cardiology Fellow, Boston Children's Hospital
99. **Faye Evans, MD (United States of America)**  
Boston Children's Hospital
100. **Dr. Fazali Wahid (Pakistan)**  
Lady Reading Hospital
101. **Dr Felix M Wina, FWACS (Nigeria)**  
General Surgeon; Binham University Teaching Hospital, Jos
102. **Francis Fynn-Thompson, MD (United States of America)**  
Boston Children's Hospital
103. **Frederick Boop, MD (United States of America)**  
President; International Society for Pediatric Neurosurgery
104. **G. Allen Finley, MD FRCPC FAAP (Canada)**  
ChildKind International
105. **Gabrielle H. van Ramshorst, MD, PhD (Belgium)**  
Consultant Surgical Oncologist; Ghent University Hospital
106. **Genevieve Orchelle Endalle Mouncole (Cameroon)**  
Second Vice President of Internal Affairs; Association of Future African Neurosurgeons
107. **Geoff Ibbotson, MSc, MD, FRCSC, FACS (Switzerland)**  
Executive Director, Global Surgery Foundation
108. **Geoffrey Anderson, MD MPH (United States of America)**  
Faculty, Research Fellow; Program in Global Surgery and Social Change, Harvard Medical School
109. **Gezzer Ortega, MD, MPH (United States of America)**  
Instructor, Center for Surgery and Public Health
110. **Greg Klazura, MD (United States of America)**  
Global Surgery Fellow, University of Illinois at Chicago
111. **Hafeez Abdelhafeez, MD (United States of America)**  
St. Jude Children's Research Hospital
112. **Hamza Khan, MBBS (Pakistan)**  
Resident; Khyber teaching hospital
113. **Han Na Park, PA-C (United States of America)**  
Brigham and Women's Hospital
114. **Dr Hassan Ali Daoud (Somaliland)**  
General Physician; Hargeisa Group Hospital
115. **Heidi Stensmyren, MD, MBA (Sweden)**  
President; World Medical Association
116. **Helena Franco, MD, MSurg (United States of America)**  
MMSc-GHD Candidate; Harvard Medical School
117. **Helmut A. Segovia Lohse, MD (Paraguay)**  
Hospital de Clinicas, Universidad Nacional de Asunción

118. **Herbert De Praetere, MD (Belgium)**  
Chief of Department; Imelda hospital Bonheiden
119. **Hernan Sacoto Aguilar, MD (Ecuador)**  
Professor; Universidad del Azuay
120. **Dr Hesham Abozied (Egypt)**  
Lecturer, Urology Department, Faculty of Medicine, Al-Azhr University
121. **Hodan Abdi, BS (United States of America)**  
Research Associate; Program in Global Surgery and Social Change, Harvard Medical School
122. **Hung Wei Pin, MBBS (Malaysia)**  
President, InciSioN Malaysia
123. **Professor Hyla-Louise Kluyts, MBChB MMed (Anaest) DMed (Anaest) (South Africa)**  
Director, Safe Surgery SA
124. **Dr Ian Macharia (Kenya)**  
Executive Member; Kenya Ear Nose and Throat Society
125. **Indiana Siu, MA (Nicaragua)**  
Regional Director; Operation Smile, Inc.
126. **Ingrid Ganske, MD (United States of America)**  
Pediatric Plastic Surgeon; Boston Children's Hospital
127. **Dr Irakoze Pacifique (Burundi)**  
Co-founder; InciSioN Burundi
128. **Irene Devine Dzirasa, MSc. (Ghana)**  
Policy and Advocacy Associate, Operation Smile, Inc.
129. **Dr Isaac Karogo Mwangi (Kenya)**  
Surgeon; Marsabit County referral hospital
130. **Jack Phillip Rock, MD (United States of America)**  
Interim chairman; Department of Neurosurgery, Henry Ford Hospital
131. **Jacqueline Kitulu, MD, MBA (Kenya)**  
Board Member; Kenya Medical Practitioners and Dentists Council
132. **Jacques Hernigou, MD (Belgium)**  
PhD student; Université Libre de Bruxelles
133. **Jakub Gajewski, PhD (Ireland)**  
Research Program Director; Royal College of Surgeons Ireland
134. **Jameel Ismail Ahmad, MBBS, FWACS, MBA (Nigeria)**  
Head, Cardiovascular and Thoracic Surgery unit; Aminu Kano Teaching Hospital
135. **James C Glasbey, MBCh BSc PGCert MRCS (United Kingdom)**  
NIHR Doctoral Research Fellow in Global Surgery; University of Birmingham
136. **James C. Cobey, MD, MPH, FACS (United States of America)**  
Senior Associate; Johns Hopkins School of Public Health
137. **James Chang, MD (United States of America)**  
Professor and Chief of Plastic & Reconstructive Surgery; Stanford University
138. **James Dahm, MD (United States of America)**  
Orthopaedic Surgery Resident; University of Chicago Medical Center
139. **James E. Morgan, CPA (United States of America)**  
CEO; Physicians for Peace
140. **James M. Johnston, Jr., MD (United States of America)**  
Director; InterSurgeon
141. **Janet Martin, PharmD, MSc(HTA&M), PhDeq (Canada)**  
Associate Professor Anesthesia & Perioperative Medication, Director MEDICI Centre; University of Western Ontario
142. **Jared Forrester, MD (United States of America)**  
Hepatopancreatobiliary Fellow; Providence Portland
143. **Jason Tasoulas, DMD (Greece)**  
MD-PhD Student; University of Athens
144. **Jeff Whisenant, M.Sc. (United States of America)**  
President and CEO; ReSurge International
145. **Jeffrey D. Dvorin, MD, PhD (United States of America)**  
Associate Professor; Boston Children's Hospital
146. **Jennifer Hon, MBChB, BDS, MA (United States of America)**  
Research Fellow; Program in Global Surgery and Social Change, Harvard Medical School



147. **Jeri Royce (United States of America)**  
President & CEO; Esperança
148. **JF Sarwark, MD (United States of America)**  
Director; Global Alliance for Surgical, Obstetric, Trauma, & Anaesthesia Care (G4 Alliance)
149. **Joana Letícia Spadoa (Brazil)**  
Medical Student; Federal University of Health Sciences of Porto Alegre
150. **Joanna Papadakis, EMT-B, B.S. (United States of America)**  
Clinical Research Assistant; Boston Children's Hospital
151. **Johannes J Fagan, MBChB, MMed, FCS (ORL) (South Africa)**  
Professor and Chair, Division of Otolaryngology; University of Cape Town
152. **John E. Varallo, MD, MPH, FACOG (United States of America)**  
Global Director, Safe Surgery; Jhiego
153. **Dr John Evans Mwanzia (Kenya)**  
Kenya Society of Anaesthesiologists
154. **Jonathan Haar, MBA (United States of America)**  
Director; Darwinproject.org
155. **Josh Paul Wiedermann, MD (United States of America)**  
Mayo Clinic, Rochester
156. **Joshua Korn, MBA (United States of America)**  
Director, Grants Acquisition and Management; CURE International
157. **Juan Carlos Salamea, MD (Ecuador)**  
Active Member; Panamerican Trauma Society
158. **Julian Euma Ishii-Rousseau, PhD (Japan)**  
Co-founder; LIAISON
159. **Katayoun Madani, MS MD FICS(Jr) (United States of America)**  
Founder; Students4COVID
160. **Kathleen M. Casey, MD FACS (United States of America)**  
Alliance for Surgery and Anesthesia Presence
161. **Kavitha Ranganathan, MD (United States of America)**  
Assistant Professor; Brigham and Women's Hospital
162. **Kebebe bekele Gonfa, MD (Ethiopia)**  
General Surgeon; Madawalabu University, Goba Hospital
163. **KIBOS Ambrose, MD. PhD (Canada)**  
Kibos International Health Foundation
164. **Kierrah Leger, DNP, RN, NE-BC (United States of America)**  
Nurse Manager; Boston Children's Hospital
165. **Kimutai Ronoh Sylvester, MD (Kenya)**  
Consultant General Surgeon; Tenwek Hospital
166. **Konstantinos Roditis, MD, MSc (Greece)**  
Consultant Vascular Surgeon; Korgialenio-Benakio Hellenic Red Cross Hospital, Athens
167. **Kristin Long, MD, MPH (United States of America)**  
Recorder; Association of Academic Global Surgery
168. **Laura Drown, MPH (United States of America)**  
Brigham and Women's Hospital
169. **Lauri J Romanzi, MD, MScPH (United States of America)**  
Faculty; Program in Global Surgery and Social Change, Harvard Medical School
170. **Law Shen Hong, MBBS (Malaysia)**  
InciSioN
171. **Lily Gutnik, MD MPH (United States of America)**  
Assistant professor; University of Alabama at Birmingham
172. **Lim Yee Siew (Malaysia)**  
InciSioN Malaysia
173. **Lina Roa, MD MPH (Canada)**  
Obstetrics & Gynecology Resident; University of Alberta
174. **Lindsey Freeze, BA, MBA (United States of America)**  
Director; MiracleFeet
175. **Lisa Morrissey, MPH, MSN, RN (United States of America)**  
Director, Nursing/Patient Services, Hematology/Oncology/HSCT; Boston Children's Hospital
176. **Lorraine Arabang Sebopelo (Botswana)**  
Student; University of Botswana

177. **Lynne Lourdes N. Lucena, MD (Phillipines)**  
Vice President; Academy of Filipino Neurosurgeons Inc
178. **Mahmoud Mohsen Hamza, MD (United States of America)**  
Harvard T.H. Chan School of Public Health
179. **Makela Cordero Stankey, BA (United States of America)**  
Program in Global Surgery and Social Change, Harvard Medical School
180. **Marc Vallve-Bernal, MD, MHA (Spain)**  
Endocrine Surgery Unit; Hospital Universitari de Tarragona Joan XXIII
181. **Margaret Towne, MSc, MSN, RN (United States of America)**  
Chief Operating Officer; The 1789 Fund
182. **Marie-Claire Wangari, MBChB (Kenya)**  
Executive Board Member; AfroPHC
183. **Marinus Koning, MD (United States of America)**  
Founder and President; ReachAnother Foundation USA
184. **Mark Alex Varvares, MD (United States of America)**  
Professor and Chair, Otolaryngology, Head and Neck Surgery; Harvard Medical School
185. **Mark G. Shrime, MD, MPH, PhD (Ireland)**  
Chair of Global Surgery; Royal College of Surgeons Ireland
186. **Marvee Turk, MD (United States of America)**  
Operation Smile, Inc.
187. **Marwa SaedAli Emhemed, MBBch (Libya)**  
University of Tripoli, Faculty of Medicine
188. **Mary Jue Xu, MD (United States of America)**  
Global OHNS Initiative
189. **Matthew T Hey, BS (United States of America)**  
Research Associate; Program in Global Surgery and Social Change, Harvard Medical School
190. **May Htoo Thaw, MBBS, M.Med.Sc (ORL-HNS) (Myanmar)**  
Specialist Assistant Surgeon; ENT Hospital Mandalay
191. **Meena Nathan Cherian, MD (Switzerland)**  
Director, Global Health New Challenges; Geneva Foundation for Medical Education and Research
192. **Meghan Xuxin Lim, MBChB MSc MRCS DPhil (United States of America)**  
Research Fellow; Program in Global Surgery and Social Change, Harvard Medical School
193. **Melanie Sion, MD, FACS (United States of America)**  
Assistant Professor of Surgery; Yale University
194. **Dr Mellany Murgor (Kenya)**  
Member; KMA-Young Doctors Network
195. **Michael D Baird, MD (United States of America)**  
Research Fellow; Program in Global Surgery and Social Change, Harvard Medical School
196. **Michelle L. Niescierenko, MD, MPH (United States of America)**  
Director of Global Health; Boston Children's Hospital
197. **Miguel Angel Freiria Eiras, MD (Spain)**  
Hospital HM Rosaleda
198. **Monet C. McCalla, BS (United States of America)**  
Medical Student; Ohio University
199. **Dr Monty Khajanchi, DNB surgery (India)**  
Assistant Professor; Seth GSMC & KEM Hospital, Mumbai
200. **Mortel Olivier (Haiti)**  
InciSioN
201. **Muhammad Amjad Chaudhary, MBBS MS FRCS FACS (Pakistan)**  
Professor Pediatric Surgery; Children's Hospital, PIMS, Islamabad
202. **Muhammad Raji Mahmud, MD, FWACS, FACS (Nigeria)**  
Associate Professor; Ahmadu Bello University Zaria
203. **Muhammad Shah Fahad, MBBS (Pakistan)**  
Trainee; College of Physicians and Surgeons Pakistan
204. **Murad Othman Omran, MBBS (Malaysia)**  
International Islamic University Malaysia
205. **Nakul Raykar, MD MPH (United States of America)**  
Fellowship Director; Program in Global Surgery and Social Change, Harvard Medical School
206. **Nancy Abu-Bonsran, MD (United States of America)**  
Neurosurgery Resident; Johns Hopkins

207. **Naol Bekalu Terfasa, MD (Ethiopia)**  
Anesthesiologist; Jimma University
208. **Natalie Meyers, MPH (United States of America)**  
Chief Program Officer, ReSurge International
209. **Natalie Zimmelman, MBA (South Africa)**  
Chief Executive Officer, The South African Society of Anaesthesiologists (SASA)
210. **Nchafatso Obonyo, MD, PhD, DTM&H (Kenya)**  
Research Committee Chair; Kenya Medical Association
211. **Nicholas Segaren, MBChB, BSc (hons), MPH, FRCS (plast) (United Kingdom)**  
Consultant Plastic Surgeon; Cambridge University Hospitals
212. **Niclas Rudolfson, MD (Sweden)**  
Lund University
213. **Dr Nicolas Flamey (Belgium)**  
AZ Delta
214. **Nicole Ann Beck, MBA (United States of America)**  
Member of the Board of Trustees; Global Surgery Student Alliance (GSSA)
215. **Professor Niels Komen (Belgium)**  
Vice Chair Department of Abdominal, Pediatric & Reconstructive Surgery; Antwerp University Hospital
216. **Nigel Rossiter, MBBS, FRCSEd, FRCSEd(Tr&Orth), FFSTEd (United Kingdom)**  
Chair; Primary Trauma Care Foundation
217. **Olaoluwa Ezekiel Dada, BS (Cameroon)**  
Research Director; Association of Future African Neurosurgeons
218. **Dr Otmar Kloiber (Germany)**  
Secretary General; World Medical Association
219. **Pankaj Gunvantray Jani, MBChB, M.Med Surgery, FRCS, FCS(ECSA), FACS (Kenya)**  
President; Operating Theatre Practitioners Association of Kenya (OTPAK)
220. **Parsa Erfani, BA (United States of America)**  
Fogarty Global Health Fellow; Harvard Medical School
221. **Patrik Boivie, MD, PhD (Sweden)**  
Senior Consultant; Department of Plastic Surgery, Sahlgrenska University Hospital
222. **Paulo N. Martins, MD, PhD, FAST, FEBS, FACS (United States of America)**  
Associate Professor of Surgery; University of Massachusetts
223. **Peter Andrew Bird, MBBS, FRACS (Kenya)**  
General and Breast Surgeon; AIC Kijabe Hospital
224. **Peter Nthumba, MBChB, MMed(Surgery), MSc(Epidemiology) (Kenya)**  
AIC Kijabe Hospital
225. **Peter Radell, MD, PhD (Sweden)**  
Operation Smile, Inc.
226. **Phillip Webster, BSc, MBBCh, FCS.SA (ortho) (South Africa)**
227. **Pierre Marek, MD (France)**  
CHU Toulouse
228. **Priyanka K. Mathur, BS (United States of America)**  
Global Surgical, Obstetric, Trauma and Anaesthesia Fellow; The G4 Alliance
229. **Prosper Katugume, MBChB (Uganda)**  
Student; Mbarara University Of Science And Technology
230. **Quinn Kerr Lippmann, MD, MPH (United States of America)**  
Global Surgical Expedition
231. **Rahel Nardos, MD, MCR (United States of America)**  
Director of Global Women's Health; Center for Global Health and Social Responsibility, University of Minnesota
232. **Raymen Arviin Chandrasagran (Malaysia)**  
Medical Student; University of Malaya
233. **Remezo Mususa Patrick (Democratic Republic of the Congo)**  
Medical Student; Université Catholique de Bukavu
234. **Richard Peter Moser, MD (United States of America)**  
Professor of Neurological Surgery; University of Massachusetts Medical School
235. **Richard Wagner, MD (United States of America)**  
Executive Director; Global ENT Outreach
236. **Rinse Meester, MD (Netherlands)**  
Treasurer; Netherlands Society for International Surgery

237. **Robert J. Dempsey, MD (United States of America)**  
Chair; The Foundation for International Education in Neurological Surgery
238. **Robert Riviello, MD, MPH (United States of America)**  
Deputy Director; Program in Global Surgery and Social Change, Harvard Medical School
239. **Rodrigo Vaz Ferreira, MD, PhD (Brazil)**  
Associate Professor; Universidade do Estado do Amazonas
240. **Rolvix H. Patterson, III, MD, MPH (United States of America)**  
Resident Physician; Duke University Medical Center
241. **Ruben E Ayala, MD, MSc (United States of America)**  
Chief Medical Officer; Operation Smile, Inc.
242. **Ryan Frisbie, MD, MPH (United States of America)**  
Harvard T.H. Chan School of Public Health
243. **Ryan Hayton, MD, FACS, FCS(ECSA) (United States of America)**  
Associate Director of Center for Global Surgery; Loma Linda University and PAACS
244. **Dr Saad Javed (Pakistan)**  
Registrar Neurosurgery; Rawalpindi Medical University
245. **Saboye, MD, LD (France)**  
Général secretary; French Society of Plastic surgery SOFCPRE
246. **Saidu Heisenberg Mansaray (Sierra Leone)**  
Community Health Officer; Ministry of Health and Sanitation
247. **Dr Saliu Egunjobi Rafiu (Nigeria)**  
State branch chairman; ARSPON Nigeria
248. **Salome Maswime, MBChB, FCOG(SA), MMED, PhD (South Africa)**  
Head of Global Surgery; Global Surgery Division, Department of Surgery, Faculty of Health Sciences, University of Cape Town
249. **Sam Simister (United States of America)**  
MD/MBA Student; University of Utah
250. **Samaa Akhtar, MD, MSc, MRSPH (Pakistan)**  
Senior Research Fellow; Children's Heart Hospital and Research Institute
251. **Sangami Pugazenthi, BA (United States of America)**  
Medical Student; Washington University School of Medicine
252. **Sarah Hamilton, MA (United States of America)**  
Senior Programs Communications Manager; Smile Train
253. **Sarah K. Hill, MD (United States of America)**  
Research Fellow; Program in Global Surgery and Social Change, Harvard Medical School
254. **Sarah Nuss, BS (United States of America)**  
Medical Student; Warren Alpert Medical School at Brown University
255. **Sarah Woodrow, MD (United States of America)**  
Chair, Clinical Neurosciences; Cleveland Clinic Akron General
256. **Sazi Z Nzama, MBChB (South Africa)**  
Chairperson - Constitutional Matters Committee; South African Medical Association
257. **Selam Degu, MD, MSc (United States of America)**  
Research Fellow; Program in Global Surgery and Social Change, Harvard Medical School
258. **Seunggu Jude Han, MD (United States of America)**  
Associate Clinical Professor; Stanford University
259. **Shailendra Prasad, MBBS, MPH (United States of America)**  
Executive Director and Carlson Chair of Global Health; Center for Global Health and Social Responsibility, University of Minnesota
260. **Shannon Wu, BA (United States of America)**  
Medical Student; Cleveland Clinic
261. **Sharfuddin Chowdhury, MBBS, MMed, FCS(SA) (Saudi Arabia)**  
Director of Trauma Center; King Saud Medical City
262. **Shreenik Kundu, MBBS, MSc (United States of America)**  
Research Fellow; Program in Global Surgery and Social Change, Harvard Medical School
263. **Sid Gugale, BS (United States of America)**  
Drexel University College of Medicine
264. **Dr Simon Ndiritu (Kenya)**  
Surgeon; Kenya National Hospital
265. **Dr Ssewante Nelson (Uganda)**  
Makerere University

266. **Stéphane Gentil, MD (France)**  
Attending Surgeon; CHU de Bordeaux
267. **Stanley Aruyaru, MD (Kenya)**  
Member; Surgical Society of Kenya
268. **Dr Stephen Molaoa (South Africa)**  
Head of Surgery; Walter Sisulu University
269. **Steven Vryhof, PhD (United States of America)**  
President; SOTA Convoys
270. **Surjit Lidder, FRCS, FRACS, FAOrthA (Australia)**  
Consultant; The royal Melbourne Hospital
271. **Tanaz Vaghaiwalla, MD (United States of America)**  
Assistant Professor of Surgery; University of Tennessee Graduate School of Medicine
272. **Tara Ahmadi, MPH (United States of America)**  
Tufts University School of Medicine
273. **Tayana Assomptia Jean Pierre (United States of America)**  
Research Associate; Program in Global Surgery and Social Change, Harvard Medical School
274. **Taylor Wurdeman, MD, MPH (United States of America)**  
Loma Linda University
275. **Temidayo Fadelu, MD, MPH (United States of America)**  
Dana-Farber Cancer Institute
276. **Dr Thomas Onyango Kirengo, MBA, MSc (Kenya)**  
Director; Imara Mediplus Hospital
277. **Thomas Tsai, MD, MPH (United States of America)**  
Assistant Professor of Surgery; Harvard Medical School
278. **Timothy Craig Hardcastle, MBChB, MMed, FCS(SA), Trauma (HPCSA), PhD (South Africa)**  
Acting Head: General Surgery, Head of Trauma Program; University of KwaZulu-Natal
279. **Dr Timothy Mwiti (Kenya)**  
Lecturer and Anaesthesiologist; University of Nairobi, School of Medicine
280. **Tinen L. Iles, PhD (United States of America)**  
Assistant Professor; University of Minnesota
281. **Dr Tinka George William (Uganda)**  
Junior House Officer (Surgery); Kiwoko Hospital
282. **Professor Titus Sunday Ibekwe, MD (Nigeria)**  
Head of Department; Department of Otolaryngology, University of Abuja
283. **Touch Sokdavy, MD (Cambodia)**  
Head of the ENT department; Children's Surgical Centre
284. **Tracy Eastman, MBChB, MBA (South Africa)**  
University of Cape Town
285. **Travis T Tollefson, MD, MPH (United States of America)**  
Professor and Director; University of California Davis
286. **Ulrich Ronellenfisch, MD (Germany)**  
Associate Professor of Surgery; Department of Visceral, Vascular and Endocrine Surgery, University Hospital Halle
287. **Uzma Samadani, MD, PhD (United States of America)**  
Neurosurgeon; Minneapolis VA HealthCare System
288. **Valberto Sanha, MD (Brazil)**  
Global Surgical, Obstetric, Trauma and Anaesthesia Fellow; The G4 Alliance
289. **Valeria Maria Macias Fernandez, MD, MMSc (Mexico)**  
Executive Director; Compañeros en Salud
290. **Vendela Herdell (Sweden)**  
Medical Student; Karolinska Institutet
291. **Vicki L. Mahan, MD (United States of America)**  
American Heart Association
292. **Vigneshwar Raj Veerappan, MSc (United Kingdom)**  
Medical Student; Hull York Medical School
293. **Dr Waleed Mabood (Pakistan)**  
Registrar; Mercy Teaching Hospital, Peshawar
294. **Professor Walter D Johnson, MD, MBA, MPH (United States of America)**  
Professor, Surgery, Neurosurgery, and Public Health; Loma Linda University
295. **William Holmes, MD, MPH (United States of America)**

296. **Yemane Ayele, MD (Ethiopia)**  
Head of the Department of Anesthesiology; Jimma University
297. **Yuki Julius Ng, MBBS (Malaysia)**  
Co-Founder; InciSioN Malaysia
298. **Yun-Hsuan Stellina Lee, MD (Australia)**  
Royal Brisbane and Women's Hospital
299. **Zachary Jonathan Collier, MD, MS (United States of America)**  
Global Surgery Fellow, Operation Smile, Inc.
300. **Dr Zareen Sui Yin Chiba, MBBS (Hong Kong)**  
Resident, Higher Orthopaedic Trainee; Hospital Authority
301. **Dr Zineb Bentounsi (United Kingdom)**  
University Hospital Southampton,
302. **Zipporah Gathuya, MD, MPH (Kenya)**  
Secretary; Global Initiative for Children's Surgery

### **Supplementary Material 3**

#### **An open letter to the Executive Board of WHO from the surgical and anaesthesia community Organizational Signatories**

1. American Association of Nurse Anesthesiology (AANA)
2. Association of Future African Neurosurgeons (AFAN)
3. Center for Global Health and Social Responsibility, University of Minnesota.
4. CURE International
5. Global Surgery Amsterdam (GSA)
6. International Medical Response (IMR)
7. Kibos International Health Foundation (KIHF)
8. Operation Smile, Inc.
9. Physicians for Peace
10. ReSurge International
11. Sadanah Foundation, Inc
12. Students4COVID
13. The Alliance for Surgery and Anesthesia Presence (ASAP)
14. The Global Alliance for Surgical, Obstetric, Trauma, and Anaesthesia Care (The G4 Alliance)
15. West African College of Surgeons, Liberia Chapter
16. World Federation of Societies of Anaesthesiologists (WFSA)
17. World Medical Association (WMA)
